# Supplementary material for: In-Depth Quantitative Proteomics Characterization of In Vitro Selected Miltefosine Resistance in Leishmania infantum
Source: MDPI journal article supplement (doi:10.3390/proteomes10020010), 2022-03-31
Supplement: s1 [file s1]

**Table S2.** Summary of general information about the proteomes of miltefosine-resistant *Leishmania infantum* line selected in vitro and the parental *L. infantum* wild-type strain.

|                                             | <b>LiR<br/>Miltefosine-resistant line</b> | <b>WT<br/>Parental strain</b> |
|---------------------------------------------|-------------------------------------------|-------------------------------|
| <b>Biological replicates</b>                | 4                                         | 3                             |
| <b>Peptides identified</b>                  | 28156 ± 4512                              | 30913 ± 664                   |
| <b>Protein groups identified</b>            | 5071                                      | 5435                          |
| <b>Total protein per cell</b>               | 2.81 ± 0.38 pg                            | 3.74 ± 0.03 pg                |
| <b>Total protein molecules per parasite</b> | 4.3 ± 0.62 × 10 <sup>7</sup>              | 6.01 ± 0.02 × 10 <sup>7</sup> |
